# Supplementary material for: Thermal stress affects proliferation and differentiation of turkey satellite cells through the mTOR/S6K pathway in a growth-dependent manner
Source: PubMed Central journal article supplement (PMC8758067; doi:10.1371/journal.pone.0262576), 2022-01-13

**Fig 1A**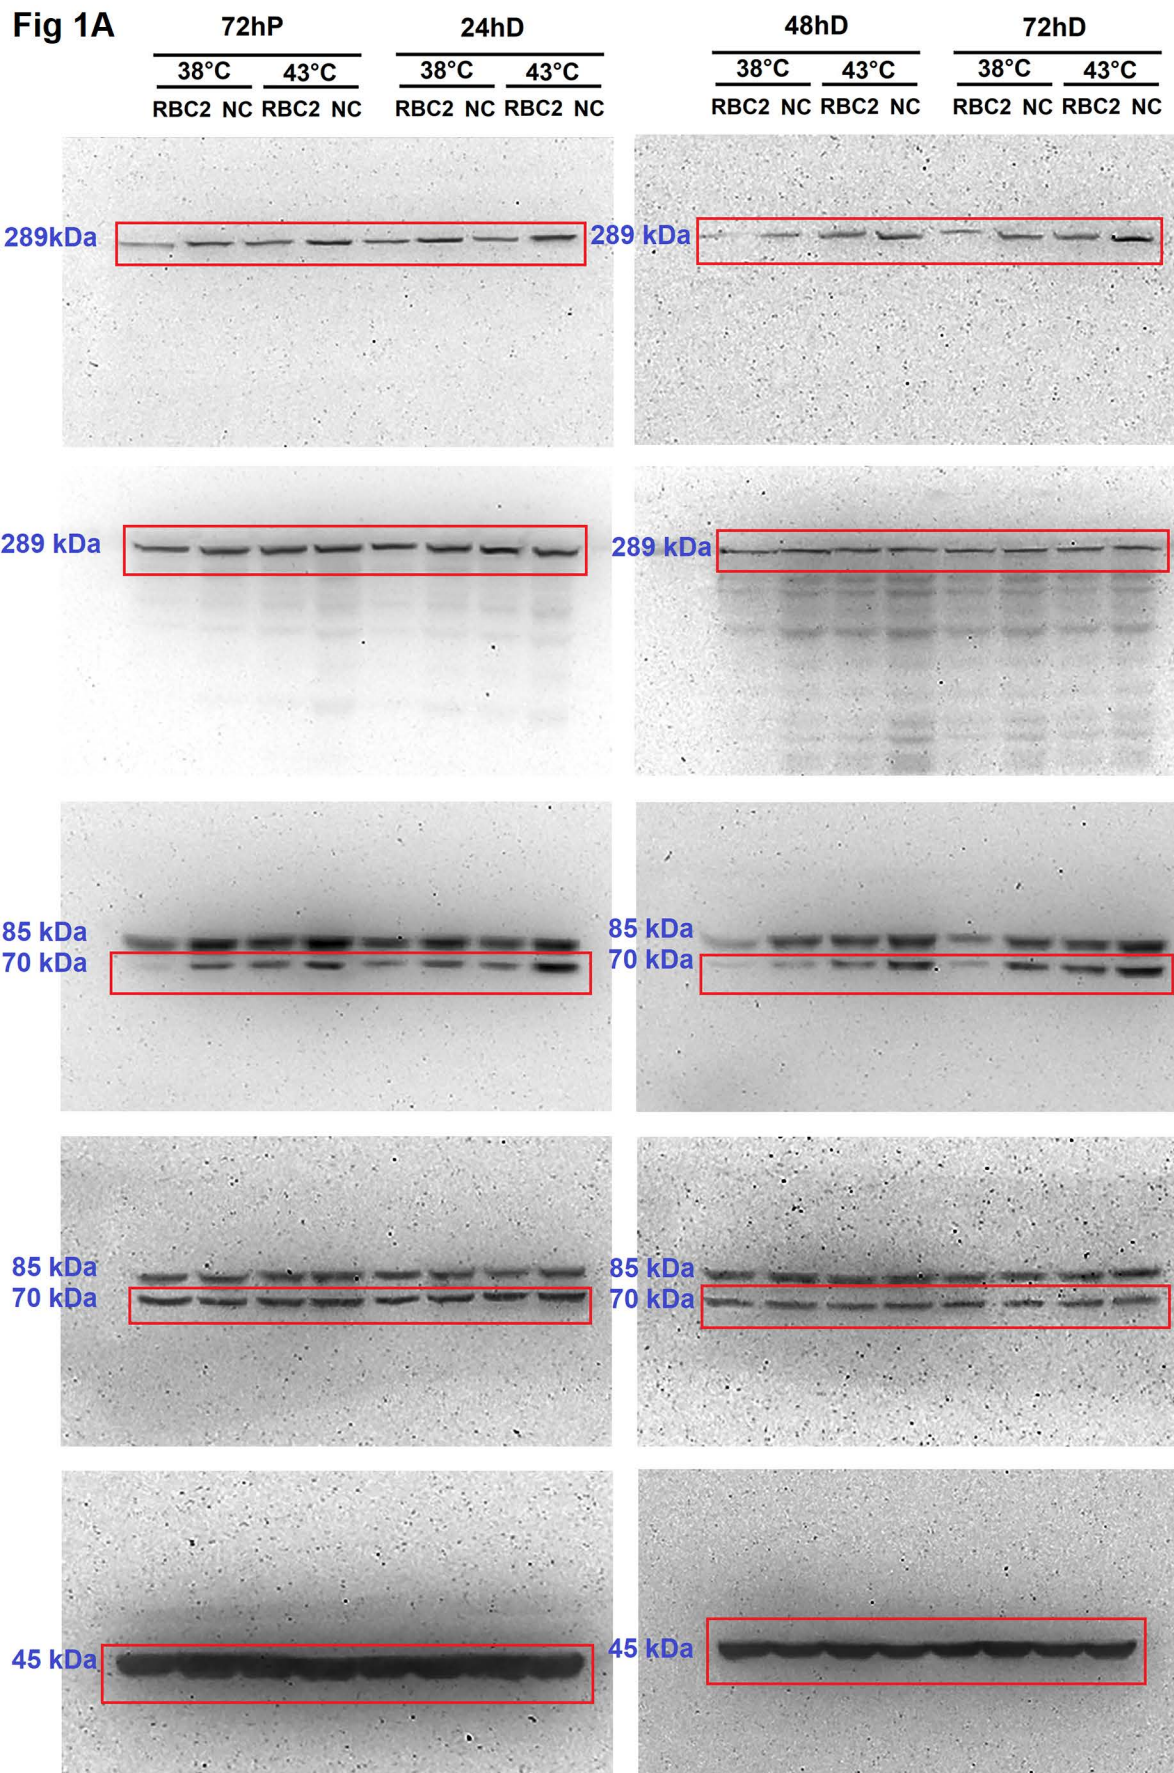

**Fig 2A**

| 72hP |    |      |    | 24hD |    |      |    | 48hD |    |      |    | 72hD |    |      |    |
|------|----|------|----|------|----|------|----|------|----|------|----|------|----|------|----|
| 38°C |    | 33°C |    | 38°C |    | 33°C |    | 38°C |    | 33°C |    | 38°C |    | 33°C |    |
| RBC2 | NC | RBC2 | NC | RBC2 | NC | RBC2 | NC | RBC2 | NC | RBC2 | NC | RBC2 | NC | RBC2 | NC |

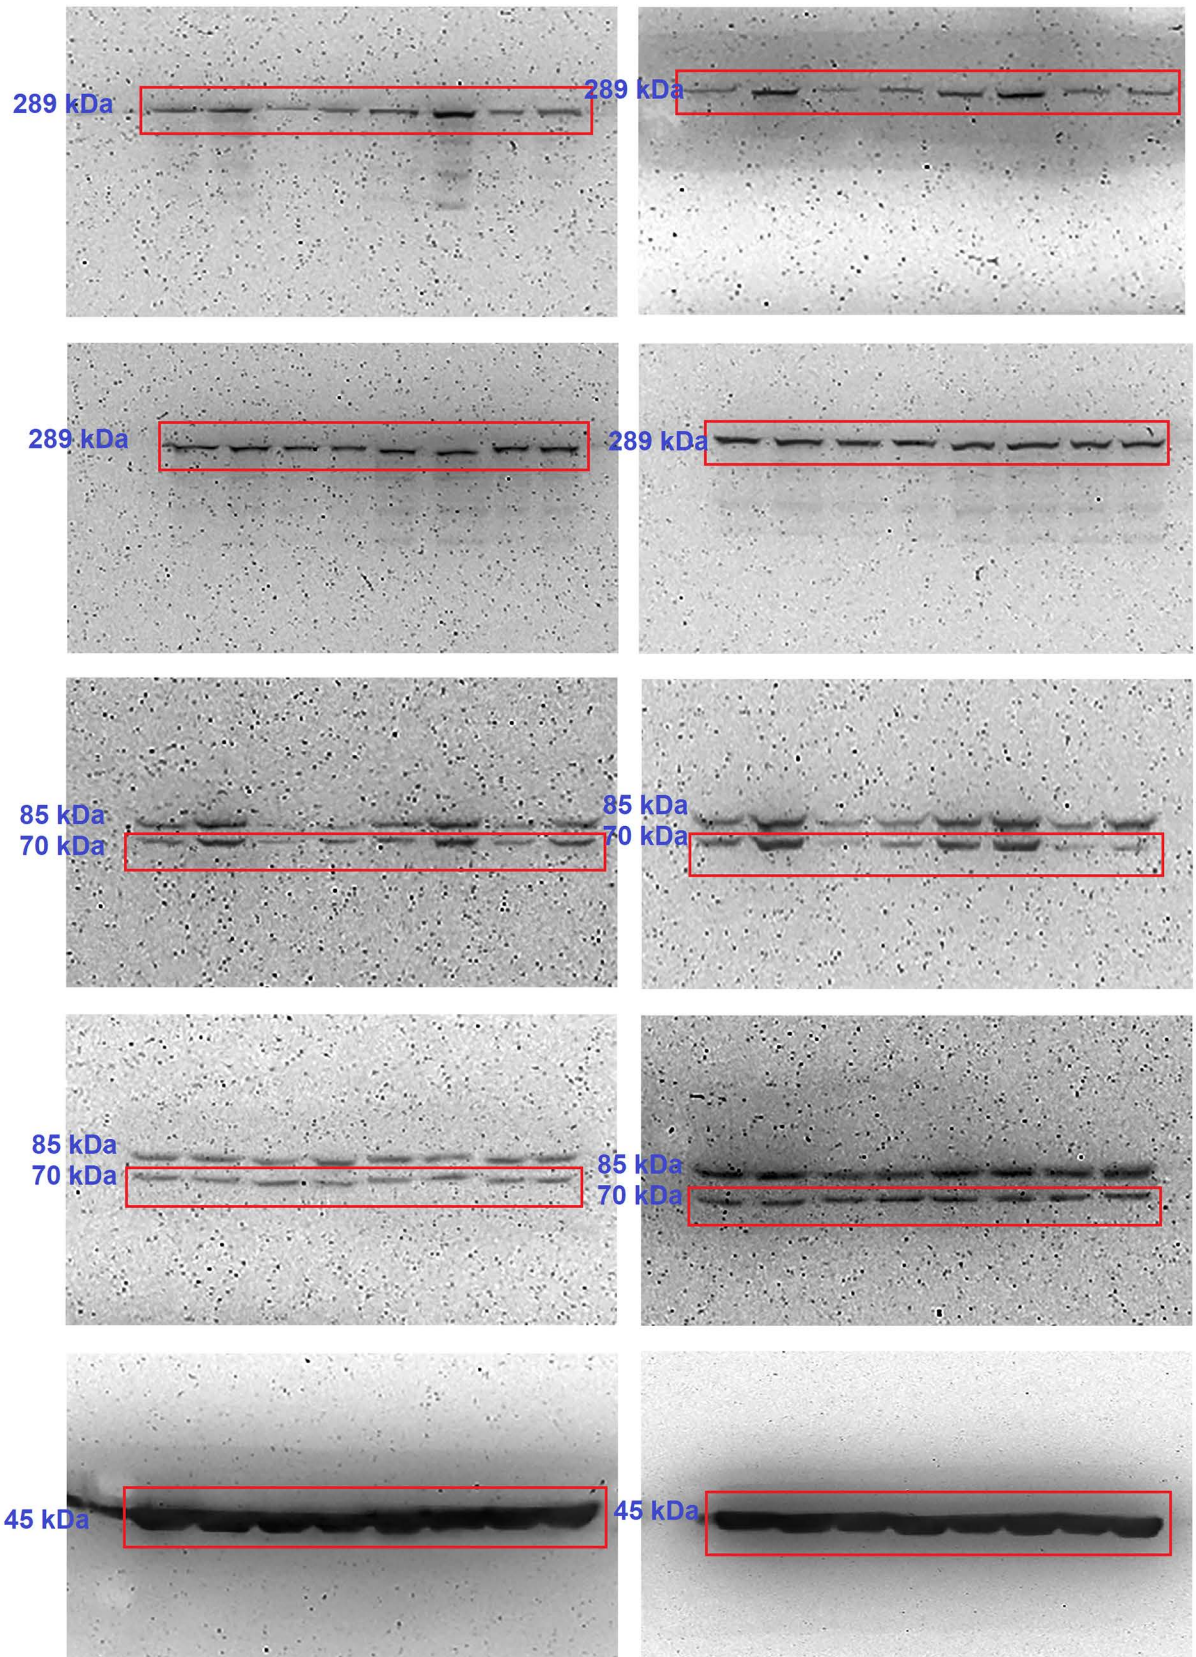

**Fig 4A**

**38°C**                      **43°C**

| 38°C    |         | 43°C    |         |
|---------|---------|---------|---------|
| Control | KD mTOR | Control | KD mTOR |
| RBC2    | NC      | RBC2    | NC      |

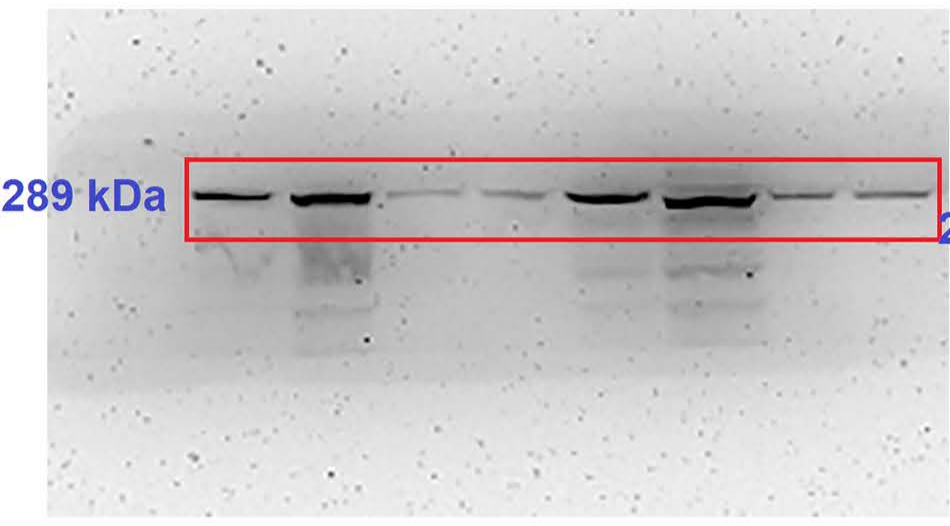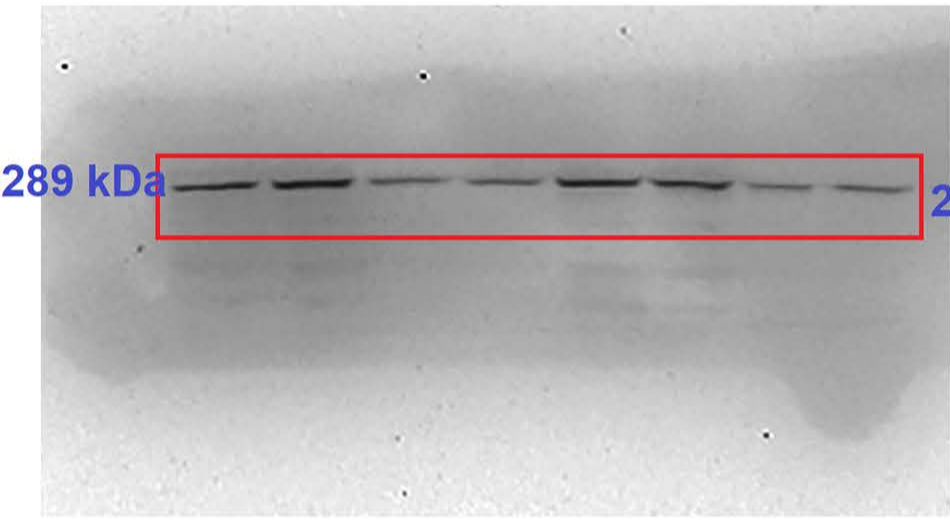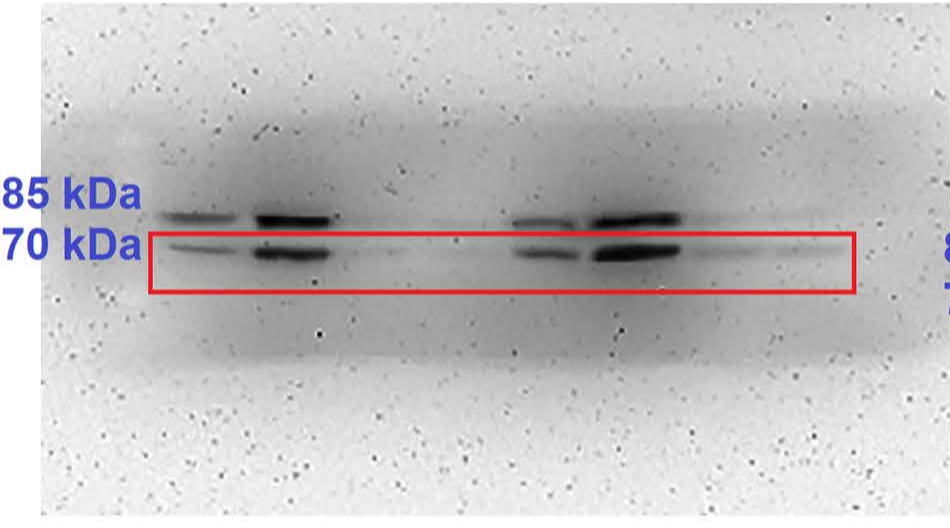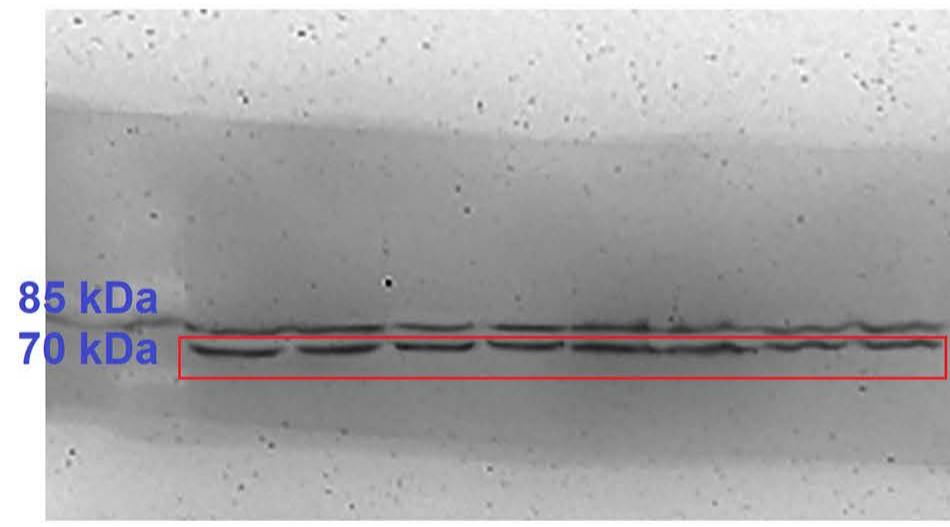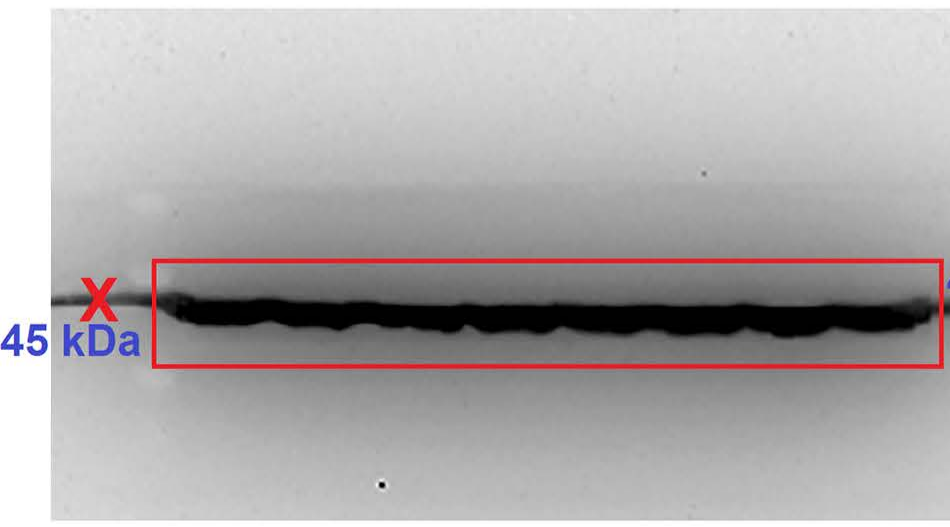

**Fig 4D**

**38°C**                      **33°C**

| 38°C    |         | 33°C    |         |
|---------|---------|---------|---------|
| Control | KD mTOR | Control | KD mTOR |
| RBC2    | NC      | RBC2    | NC      |

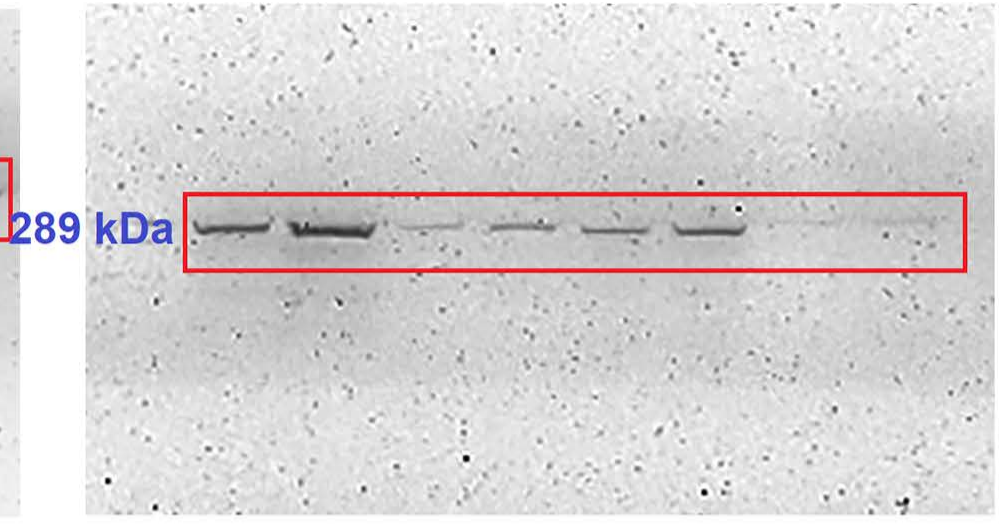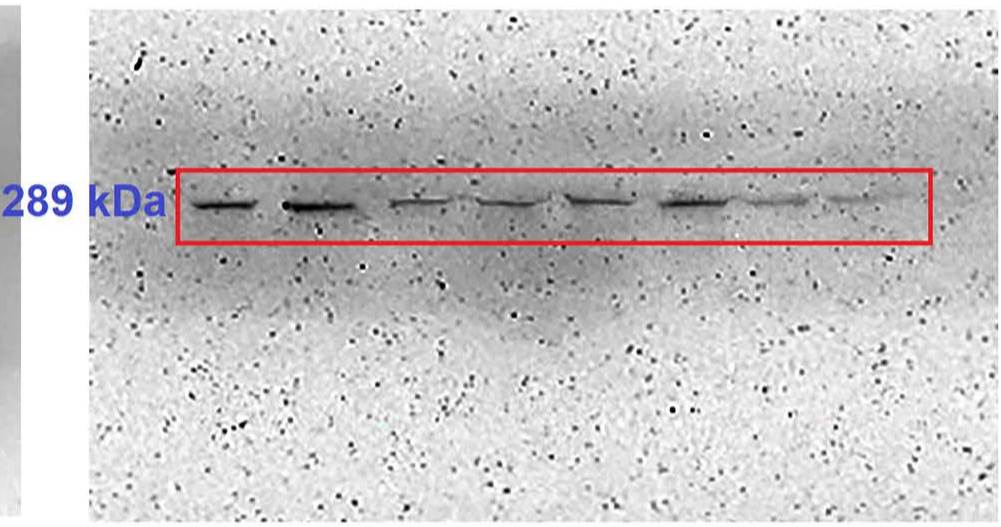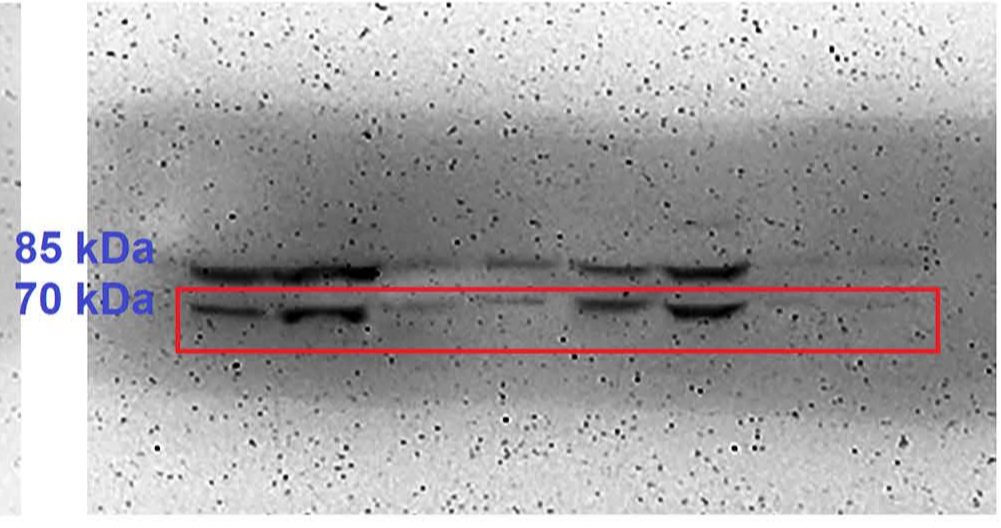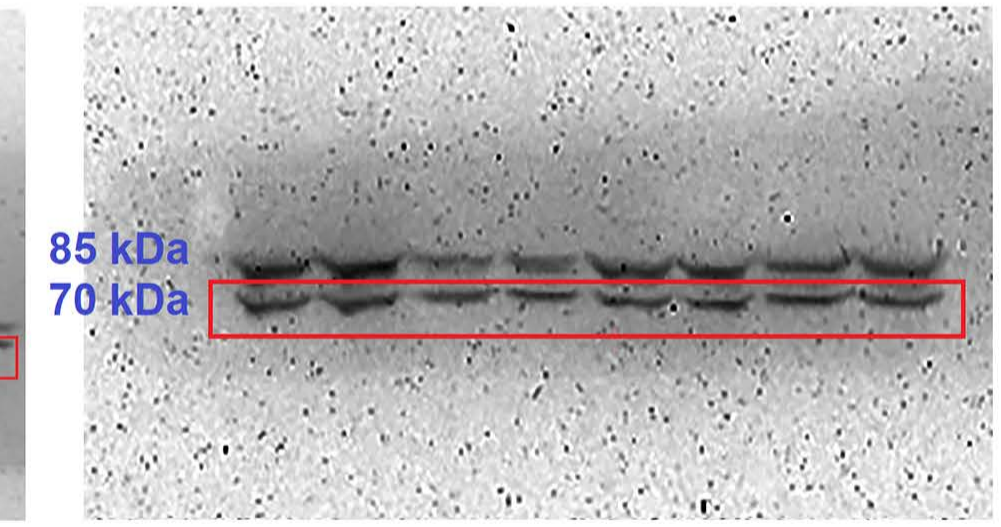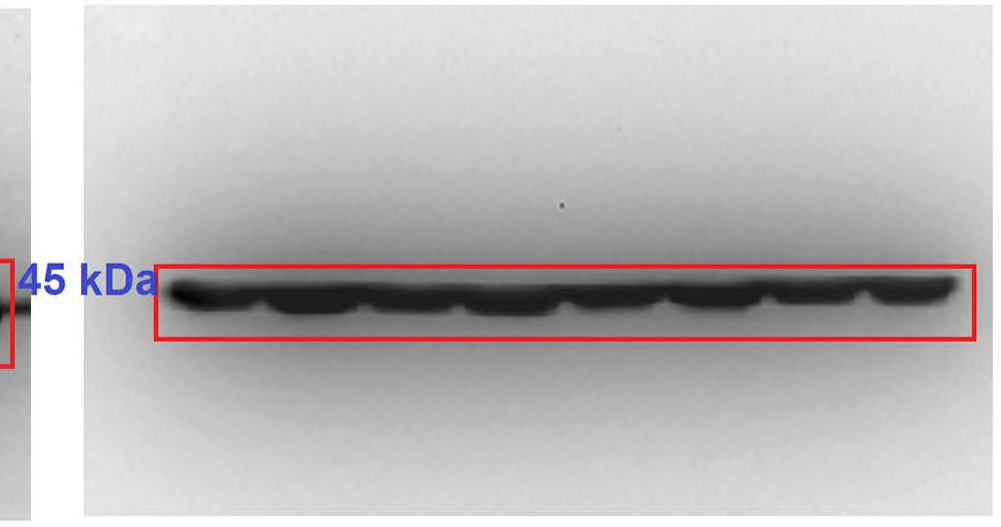

**S1 Fig A**

| 38°C    |         |         |         |
|---------|---------|---------|---------|
| 72hP    | 24hD    | 48hD    | 72hD    |
| RBC2 NC | RBC2 NC | RBC2 NC | RBC2 NC |

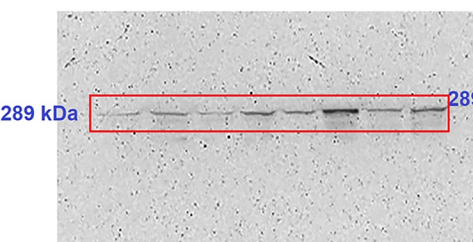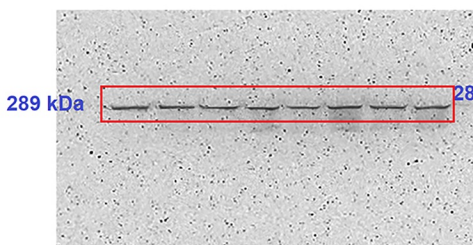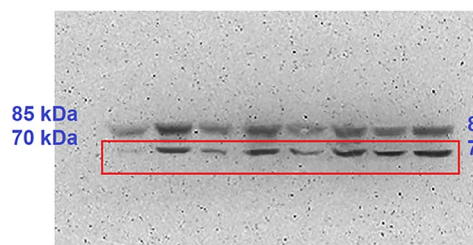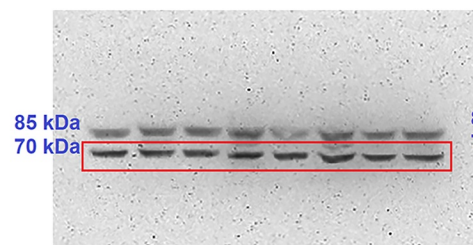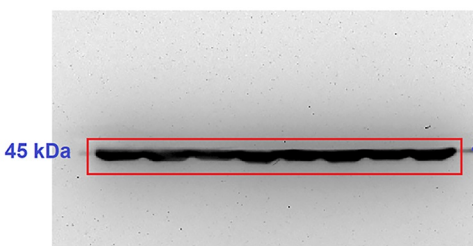**S1 Fig D**

| 43°C    |         |         |         |
|---------|---------|---------|---------|
| 72hP    | 24hD    | 48hD    | 72hD    |
| RBC2 NC | RBC2 NC | RBC2 NC | RBC2 NC |

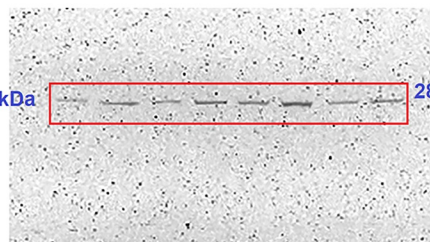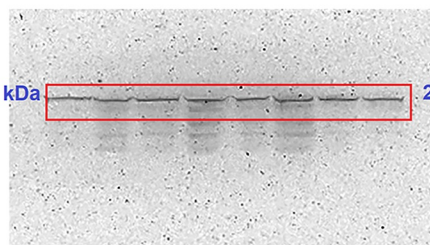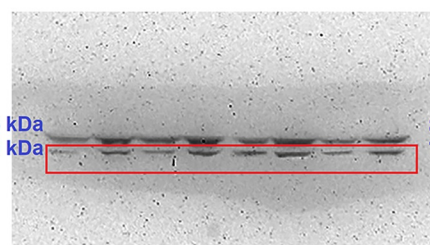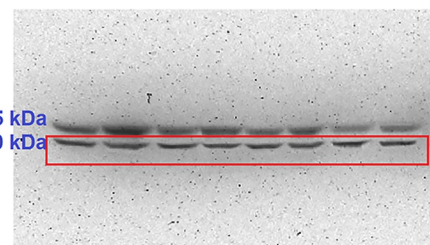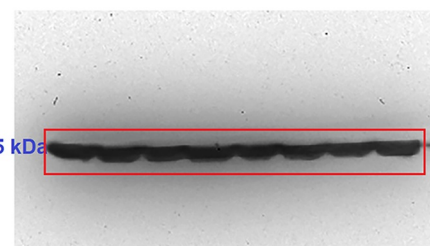**S1 Fig G**

| 33°C    |         |         |         |
|---------|---------|---------|---------|
| 72hP    | 24hD    | 48hD    | 72hD    |
| RBC2 NC | RBC2 NC | RBC2 NC | RBC2 NC |

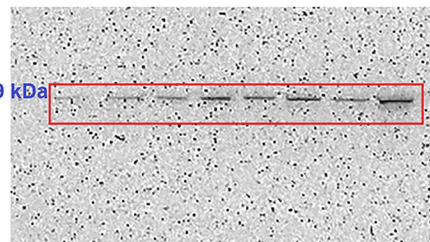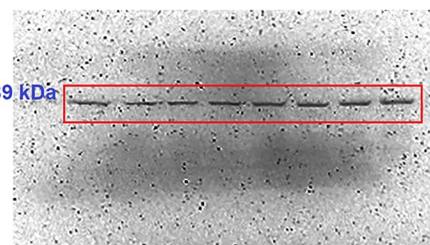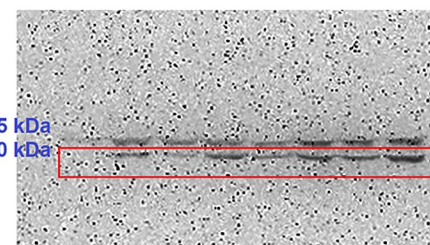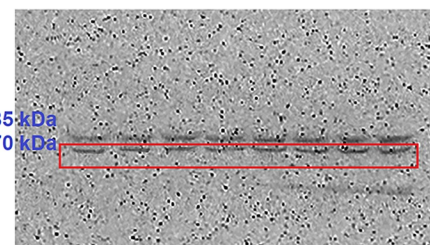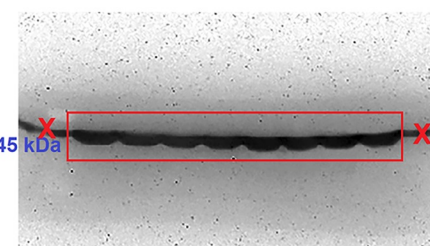

Supplement: pone.0262576.s002.pdf [file pone.0262576.s002.pdf]
